# Supplementary material for: Presentation and treatment of two cases of malignant struma ovarii
Source: Springer Nature journal article supplement (doi:10.1186/s12905-024-03002-5), 2024-03-05
Supplement: MOESM1 [file 26820140]

## CARE guidelines for case reports: 13-item checklist

Please indicate in which section each item has been reported in your manuscript. If you feel that an item does not apply to your manuscript, please enter N/A.

For more information about the CARE guidelines, please see <http://www.care-statement.org/>.

| No.                             | Description                                                                              | Section # |
|---------------------------------|------------------------------------------------------------------------------------------|-----------|
| <b>Title</b>                    |                                                                                          |           |
| 1                               | The area of focus and “case report” should appear in the title                           |           |
| <b>Keywords</b>                 |                                                                                          |           |
| 2                               | Two to five key words that identify topics covered in this case report                   |           |
| <b>Abstract</b>                 |                                                                                          |           |
| 3a                              | Introduction—What is unique about this case? What does it add to the medical literature? |           |
| 3b                              | The main symptoms of the patient and the important clinical findings                     |           |
| 3c                              | The main diagnoses, therapeutics interventions, and outcomes                             |           |
| 3d                              | Conclusion—What are the main ‘take-away’ lessons from this case?                         |           |
| <b>Introduction</b>             |                                                                                          |           |
| 4                               | Briefly summarize why this case is unique with medical literature references             |           |
| <b>Patient information</b>      |                                                                                          |           |
| 5a                              | De-identified demographic information and other patient specific information             |           |
| 5b                              | Main concerns and symptoms of the patient                                                |           |
| 5c                              | Medical, family, and psychosocial history including relevant genetic information         |           |
| 5d                              | Relevant past interventions and their outcomes                                           |           |
| <b>Clinical findings</b>        |                                                                                          |           |
| 6                               | Describe the relevant physical examination (PE) and other clinical findings              |           |
| <b>Timeline</b>                 |                                                                                          |           |
| 7                               | A timeline of relevant information from the patient’s history and this episode of care   |           |
| <b>Diagnostics assessment</b>   |                                                                                          |           |
| 8a                              | Diagnostic methods (such as PE, laboratory testing, imaging, surveys)                    |           |
| 8b                              | Diagnostic challenges (such as access, financial, or cultural)                           |           |
| 8c                              | Diagnostic reasoning including a differential diagnosis                                  |           |
| 8d                              | Prognostic characteristics (such as staging in oncology) where applicable                |           |
| <b>Therapeutic intervention</b> |                                                                                          |           |
| 9a                              | Types of intervention (such as pharmacologic, surgical, preventive, self-care)           |           |
| 9b                              | Administration of intervention (such as dosage, strength, duration)                      |           |
| 9c                              | Changes in intervention with rationale                                                   |           |
| <b>Follow-up and outcomes</b>   |                                                                                          |           |
| 10a                             | Clinician and patient-assessed outcomes when appropriate                                 |           |
| 10b                             | Important follow-up diagnostic and other test results                                    |           |
| 10c                             | Intervention adherence and tolerability (how was this assessed?)                         |           |
| 10d                             | Adverse and unanticipated events                                                         |           |
| <b>Discussion</b>               |                                                                                          |           |
| 11a                             | Discussion of the strengths and limitations in your approach to this case                |           |
| 11b                             | Discussion of the relevant medical literature                                            |           |
| 11c                             | The rationale for conclusions (including assessment of possible causes)                  |           |
| 11d                             | The primary “take-away” lessons of this case report                                      |           |
| <b>Patient perspective</b>      |                                                                                          |           |

|                         |                                                                         |  |
|-------------------------|-------------------------------------------------------------------------|--|
| 12                      | When appropriate, the patient can share their perspective on their case |  |
| <b>Informed consent</b> |                                                                         |  |
| 13                      | The patient should give informed consent                                |  |

**When submitting your manuscript via the online submission form, please upload the completed checklist as a Figure/supplementary file.**

**If you would like this checklist to be included alongside your article, we ask that you upload the completed checklist to an online repository and include the guideline type, name of the repository, DOI and license in the *Data availability* section of your manuscript.**

Developed from: Riley DS, Barber MS, Kienle GS, AronsonJK, von Schoen-Angerer T, Tugwell P, Kiene H, Helfand M, Altman DG, Sox H, Werthmann PG, Moher D, Rison RA, Shamseer L, Koch CA, Sun GH, Hanaway P, Sudak NL, Kaszkin-Bettag M, Carpenter JE, Gagnier JJ. CARE guidelines for case reports: explanation and elaboration document. J Clin Epidemiol. 2017 May 18. pii: S0895-4356(17)30037-9.

<https://doi.org/10.1016/j.jclinepi.2017.04.026>
